# Supplementary material for: ProBID-Net: a deep learning model for protein–protein binding interface design
Source: Royal Society of Chemistry journal article supplement (doi:10.1039/d4sc02233e), 2024-01-01
Supplement: d4sc02233e1.pdf [file d4sc02233e1.pdf]

## Supporting Information

### ProBID-Net: A Deep Learning Model for Protein-Protein Binding

#### Interface Design

Zhihang Chen<sup>a</sup>, Menglin Ji<sup>a</sup>, Jie Qian<sup>a</sup>, Zhe Zhang,<sup>a</sup> Xiangying Zhang,<sup>a</sup> Haotian Gao,<sup>a</sup> Haojie Wang,<sup>a</sup>

Renxiao Wang,<sup>a\*</sup> Yifei Qi<sup>a\*</sup>

<sup>a</sup>*Department of Medicinal Chemistry, School of Pharmacy, Fudan University, 826 Zhangheng Road, Shanghai 201203, People's Republic of China*

\*Email: [yfqi@fudan.edu.cn](mailto:yfqi@fudan.edu.cn) (Y. Qi); [wangrx@fudan.edu.cn](mailto:wangrx@fudan.edu.cn) (R. Wang)

This file includes:

- Figure S1: Residue type Precision, Recall, F1\_score
- Figure S2: Sensitivity of recovery to the initial placement of the ligand chain
- Figure S3: Correlation between protein-protein binding affinity and recovery rate
- Figure S4: Recovery on hotspot residue
- PDB IDs of test sets
  - Table S1: The number of docked structures at varying levels of structural deviation from the wild-type complex.
  - Table S2: TS920
  - Table S3: Folddock set
  - Table S4: Denovo set

## Residue type precision, Recall, F1\_score

We further evaluated the accuracy of ProBID-Net in predicting specific amino acids and compared it to ProteinMPNN.

Precision represents the percentage of correct predictions out of all the predicted instances, recall indicates the percentage of wild-type amino acids that are correctly predicted out of all the actual instances, and the F1 score is a combined measure of precision and recall, providing a balanced evaluation of the model's performance. The results of our analysis show that ProBID-Net exhibits higher precision for most amino acids, especially for Met, Gln, and Tyr. Additionally, ProBID-Net demonstrates comparable recall and F1 scores to ProteinMPNN, indicating that it performs well in correctly identifying true positive instances and achieving a balance between precision and recall, shown in **Figure S1**. Furthermore, ProBID-Net shows a tendency to predict Met, Glu, and Ile with high accuracy. However, it is slightly less accurate than ProteinMPNN in predicting Phe and Leu. Despite this slight difference, ProBID-Net still performs well overall and proves to be a promising model for accurately predicting specific amino acids in protein sequences.

TS920

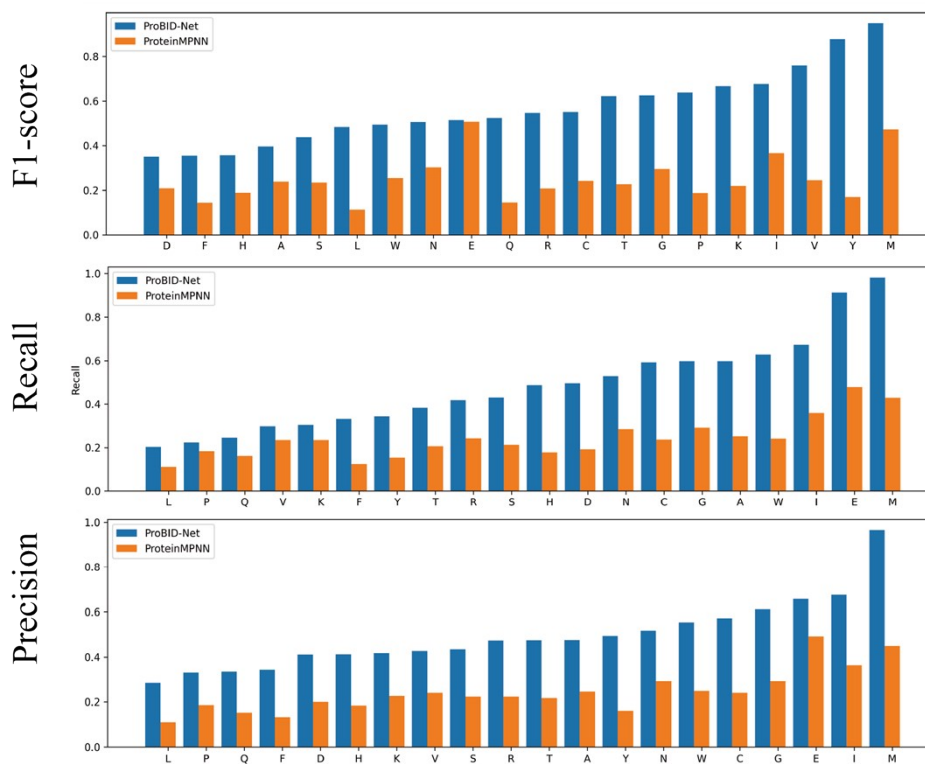

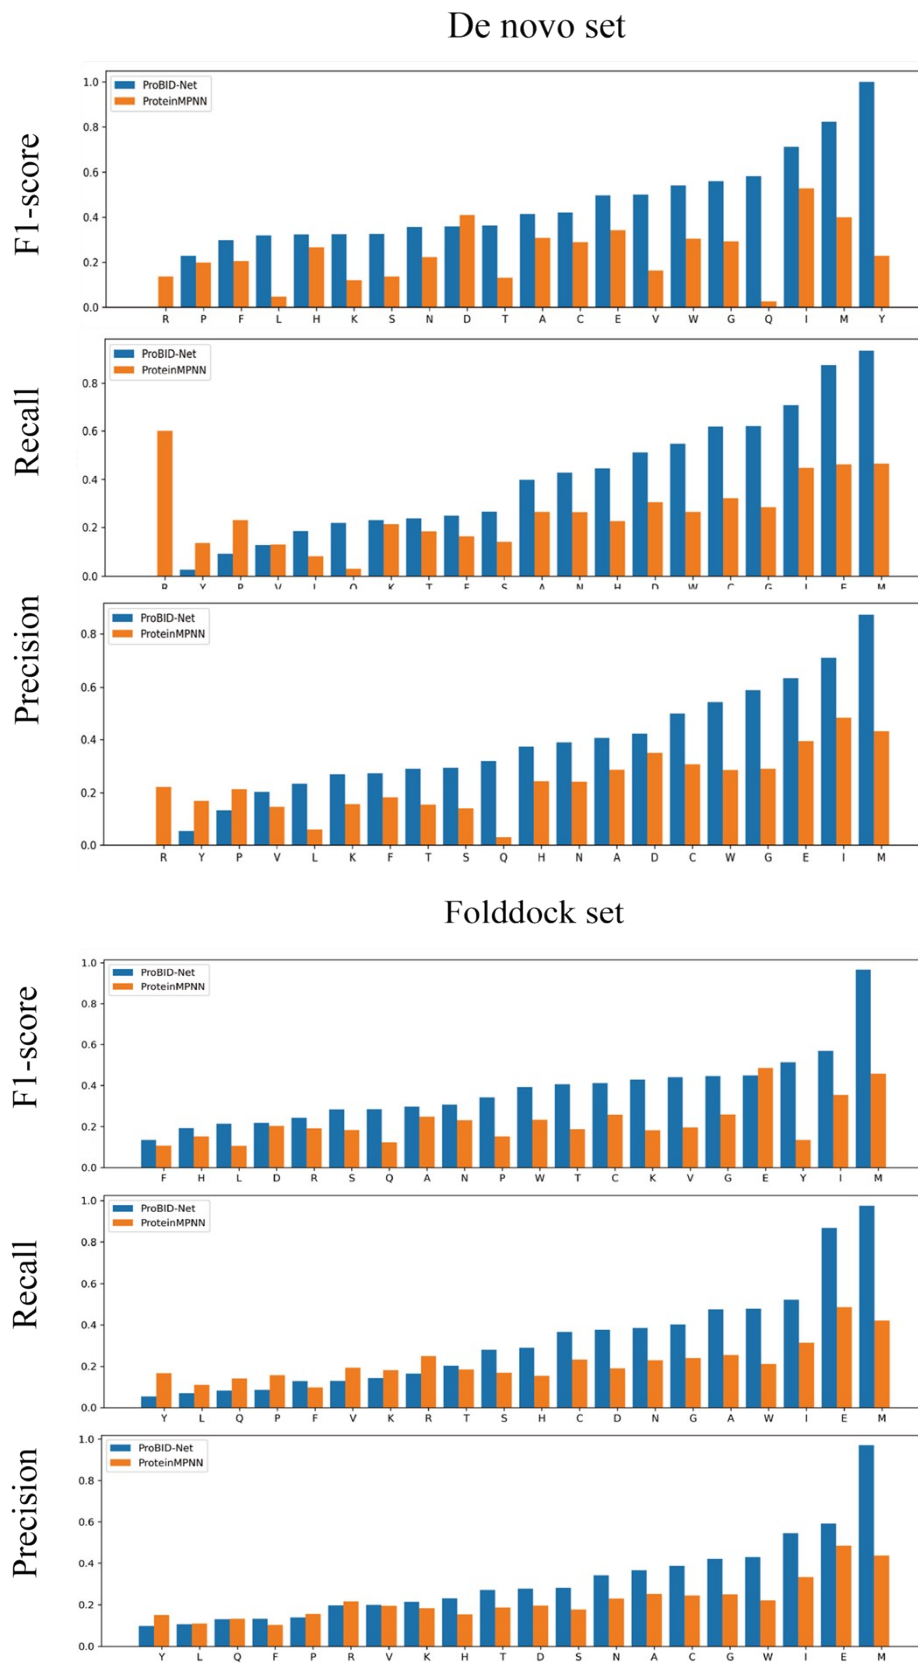

**Figure S1.** Recall, precision, and F1 score of ProBID-Net and ProteinMPNN for each amino acid on TS920, *De novo* set and Folddock set.

**Table S1.** The number of docked structures at varying levels of structural deviation from the wild-type complex.

| <b>Test Sets</b>    | <b>RMSD &lt; 1 Å<br/>Complex Count</b> | <b>1 Å &lt; RMSD &lt; 5 Å<br/>Complex<br/>Count</b> | <b>RMSD &gt; 5 Å<br/>Complex Count</b> | <b>Wild-type<br/>Complex Count</b> |
|---------------------|----------------------------------------|-----------------------------------------------------|----------------------------------------|------------------------------------|
| <b>denovo set</b>   | 20                                     | 11                                                  | 46                                     | 31                                 |
| <b>Folddock set</b> | 349                                    | 94                                                  | 366                                    | 275                                |
| <b>Ts920 set</b>    | 175                                    | 59                                                  | 157                                    | 141                                |

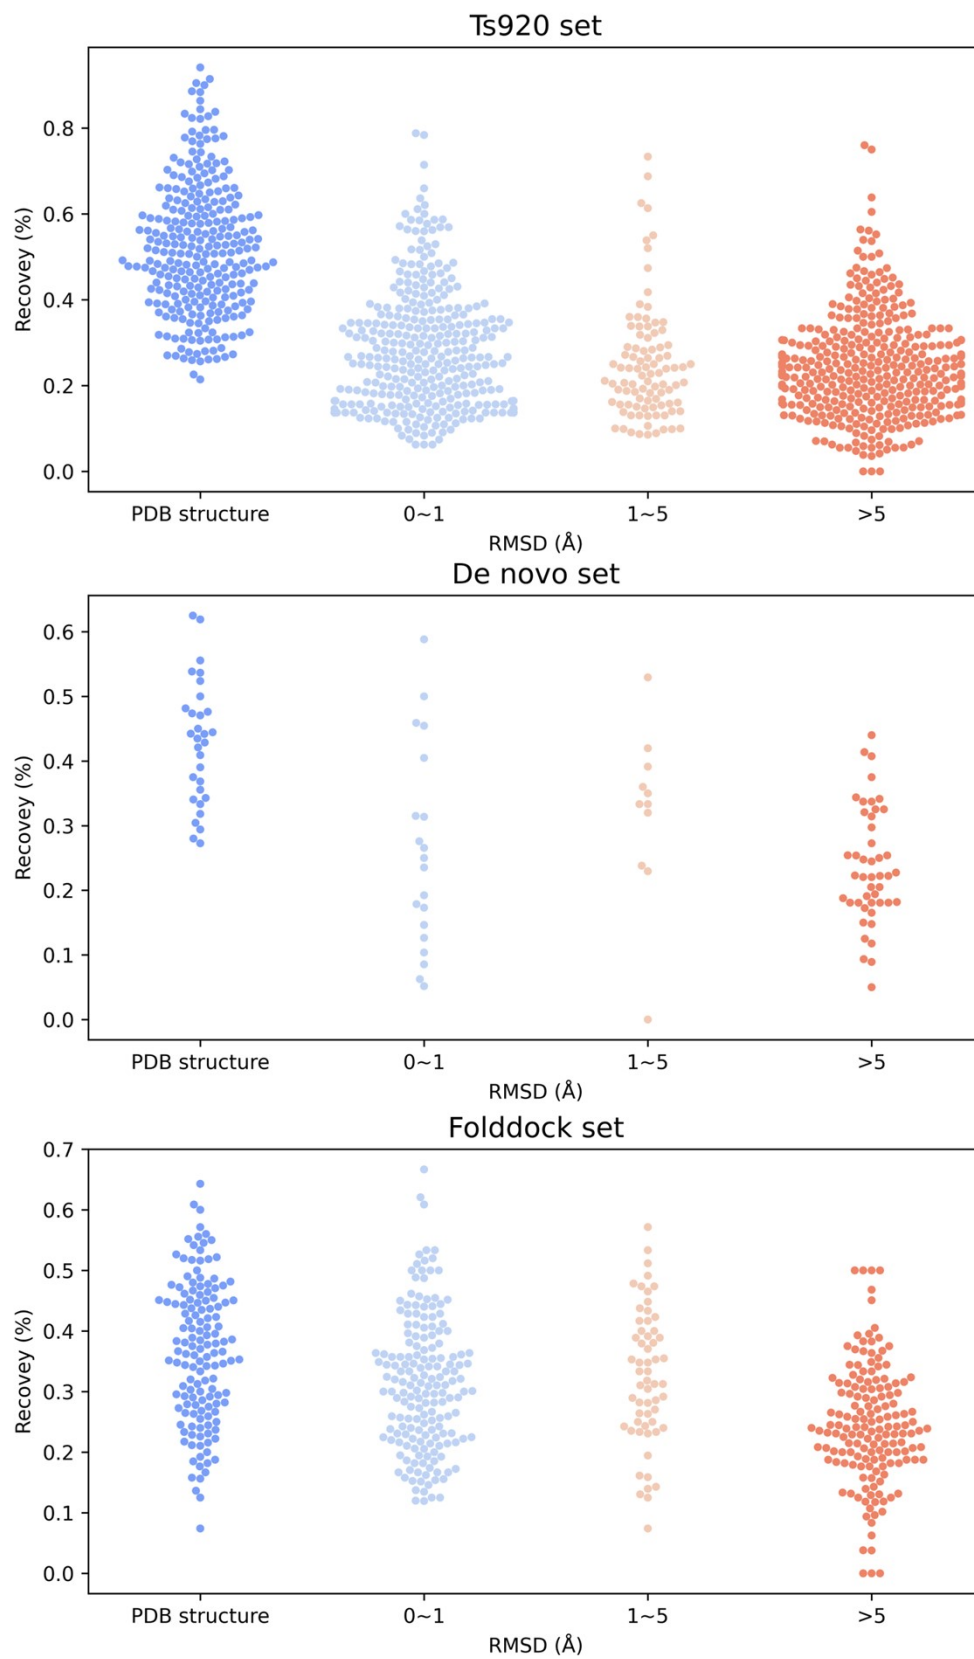

**Figure S2.** Distribution of predicted recovery in docked structures across the TS920, De novo, and Folddock sets, with different colors representing varying levels of structural deviations.

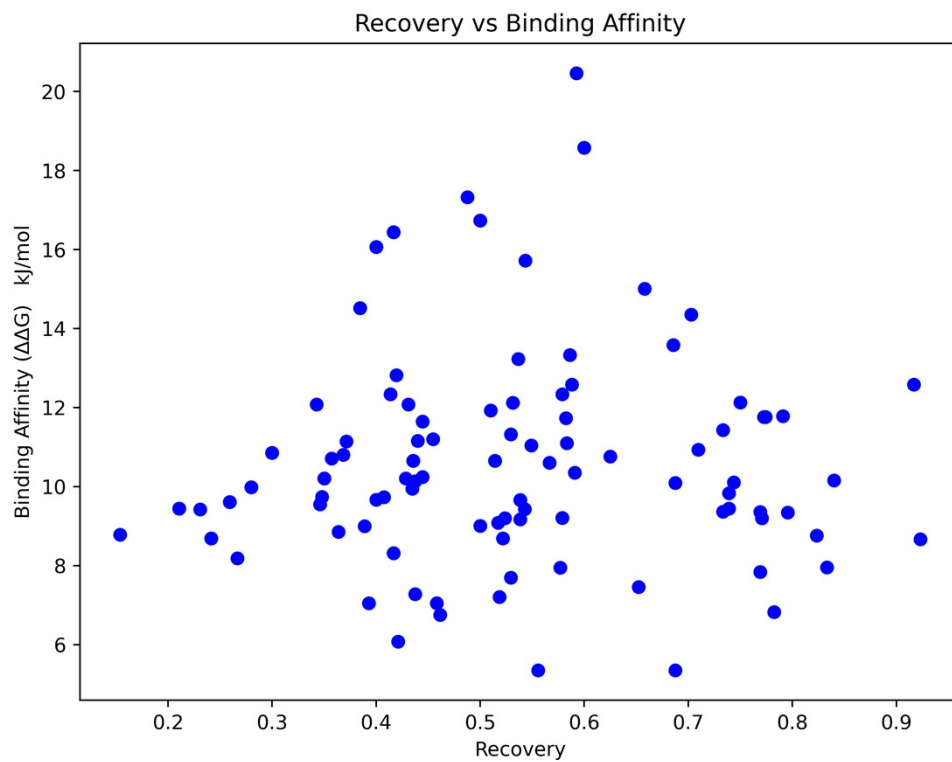

**Figure S3.** Recovery rate of ProBID-Net with respect to binding affinity of protein-protein complex.

**Figure S4.** Residue recovery of hotspots. Hotspot residues are represented by red crosses. Each protein-protein contact is represented by a blue dot.

**PDB IDs of tested ligand pairs in each set**

(1) TS920<sup>1,2</sup>:

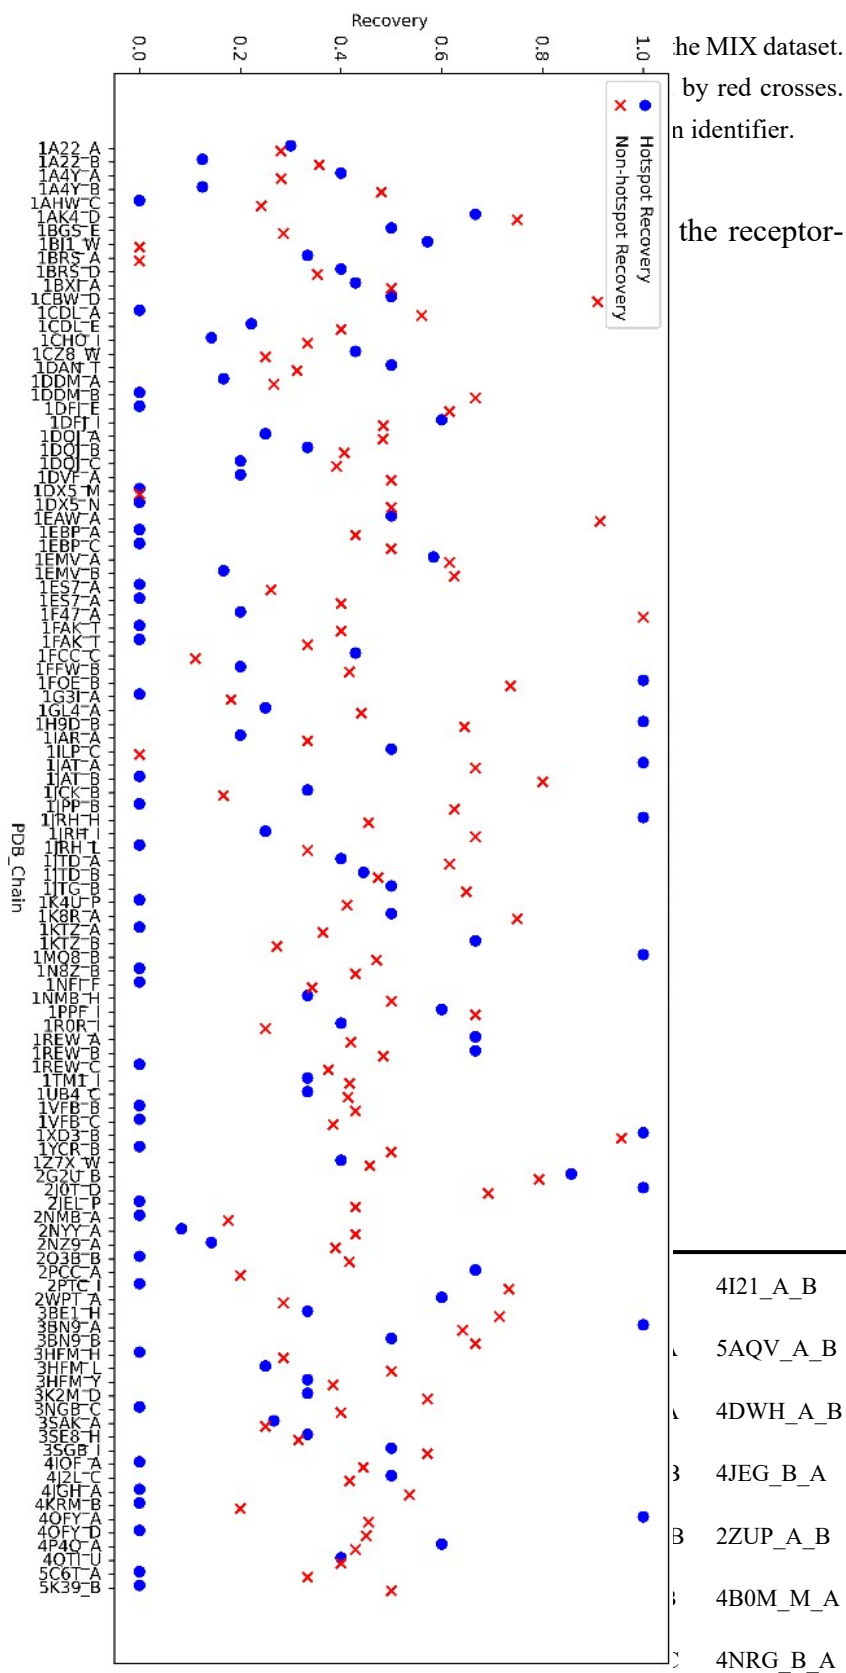

**Table S2: The list of**

|          |          |          |          |          |          |          |
|----------|----------|----------|----------|----------|----------|----------|
| 4AG2_C_A | 1Z0K_A   |          |          |          |          | 4I21_A_B |
| 4ZPR_A_B | 2D74_A   |          |          |          |          | 5AQV_A_B |
| 1J2J_A_B | 3IMQ_B   |          |          |          |          | 4DWH_A_B |
| 3TUF_B_A | 3ZJY_A   |          |          |          |          | 4JEG_B_A |
| 3C5J_A_B | 2VGO_A   |          |          |          |          | 2ZUP_A_B |
| 3D65_I_E | 4LLM_F   |          |          |          |          | 4B0M_M_A |
| 4F0Z_A_B | 1JCH_A   |          |          |          |          | 4NRG_B_A |
| 1BXI_A_B | 2P8Q_A_B | 6SA7_A_B | 6XUL_B_A | 3CPJ_B_G | 3UIR_A_B | 1P9M_A_B |
| 1ZBD_A_B | 2QNA_A_B | 4ONN_B_A | 2P22_A_B | 2G38_B_A | 3X1L_B_A | 3A8Y_A_B |

|          |          |          |          |          |          |          |
|----------|----------|----------|----------|----------|----------|----------|
| 3M7Q_B_A | 3NVI_B_A | 2Z6K_C_A | 2DYM_A_B | 3T62_B_A | 2Y69_A_M | 3TJ3_A_B |
| 3D2E_B_A | 2XAJ_B_A | 3ZMS_B_A | 4AFS_C_A | 4LLD_B_A | 4ZEQ_B_A | 4OV6_G_A |
| 1OL5_A_B | 3HCU_B_A | 7T2F_A_B | 3NMU_B_C | 1IXS_A_B | 2C1T_A_B | 4ZPH_A_B |
| 4DJ9_A_B | 5T5W_B_A | 5WPL_A_B | 1VG0_B_A | 4F0Z_A_C | 4KFZ_A_B | 3KF9_A_B |
| 2Y69_A_B | 2Y69_A_D | 3NMU_C_A | 5T48_A_B | 2GWW_A_B | 4IF6_A_B | 1R5I_A_B |
| 3WOE_A_B | 4KXQ_A_B | 4ONM_B_A | 3M3Z_A_B | 4HLQ_B_A | 2PMS_A_B | 4QKO_A_B |
| 4M6B_A_C | 3TW8_B_A | 3C5T_B_A | 3L3T_E_A | 3MZW_A_B | 3W1Y_C_A | 1J7D_B_A |
| 2ZWE_A_B | 3R2C_A_B | 3ZMZ_B_A | 4LN0_B_A | 3KYS_A_B | 1UJW_B_A | 5EW5_E_A |
| 4C0A_C_A | 4ONL_B_A | 3JZA_A_B | 1DP5_A_B | 1HR7_B_A | 2X19_A_B | 1RRP_A_B |
| 3AWV_A_B | 3RFZ_F_E | 3SJA_A_B | 4U8H_A_B | 3IO8_A_B | 2FYU_I_A | 2BZW_A_B |
| 3FZK_A_B | 1T01_A_B | 5HPS_A_B | 3EFO_A_B | 2XAS_B_A | 3A36_A_B | 2YPA_A_B |
| 1HX1_A_B | 6S9P_A_B | 5H2W_C_A | 2PQA_B_A | 4H10_A_B | 1T08_A_B | 2HVY_D_A |
| 1EGJ_L_A | 6YWD_B_A | 7AYE_B_A | 4YL8_B_A | 4UEM_A_B | 5HPK_A_B | 1QGK_A_B |
| 3JZF_A_B | 3O4O_B_A | 1BH9_A_B | 1RH5_A_B | 4B8L_A_D | 1B98_A_M | 3DCG_B_A |
| 6Q2X_L_A | 4ZI2_A_B | 4ROE_B_A | 2Y69_N_Y | 4ZP3_A_B | 1WQ1_R_G | 4W4L_B_A |
| 5WPM_A_B | 2HRK_B_A | 2VOI_B_A | 3DOE_A_B | 2B5U_A_B | 3KJL_B_A | 1R6O_B_A |
| 5D1L_A_B | 4R6U_A_B | 3W2V_B_A | 4PBW_D_A | 3ZN1_B_A | 1WX2_A_B | 3IDC_B_A |
| 1NW9_A_B | 3TDZ_B_A | 3DOF_A_B | 3Q9N_C_A | 1VIW_A_B | 3QC8_A_B | 2QWP_A_B |
| 5WLB_A_B | 7NAM_B_A | 3ZVQ_A_B | 1PVH_A_B | 3EJD_A_B | 4S0H_B_A | 3F62_B_A |
| 3TNQ_A_B | 2P22_A_D | 1RE0_A_B | 3X1L_B_C | 6SA8_A_B | 1IXR_B_A | 1MG9_B_A |
| 4K8R_C_A | 3S90_A_B | 4WBB_A_B | 3TKL_A_B | 3TZ1_A_B | 1U35_C_A | 3VHX_A_B |
| 3N1G_A_B | 1MBX_A_B | 1BND_A_B | 2QN6_A_B | 4REQ_A_B | 1I1R_A_B | 1NH2_A_D |
| 4ETW_C_A | 3FZM_A_B | 3QBT_C_A | 4TKP_A_B | 5C7J_A_B | 3OG4_B_A | 2QSF_X_A |
| 3TJ5_A_B | 1XWJ_A_B | 4FMD_B_A | 1MBV_A_B | 1MIU_A_B | 2EFH_B_A | 7CEI_A_B |
| 2ZWG_A_B | 3VZA_A_B | 5HPL_A_B | 1ZW0_A_B | 4BD9_B_A | 4HPL_A_B | 2CFH_A_B |
| 2PMZ_G_T | 4D18_E_H | 6S8S_A_B | 1Ytz_I_C | 3O4O_A_B | 4KB8_A_B | 1N1J_A_B |
| 3AX0_A_B | 3D1M_A_B | 3SL9_A_B | 3M0D_D_A | 3D5S_A_B | 3E1Y_E_A | 1B5F_B_A |
| 3WO4_A_B | 1RKC_A_B | 1X3Z_B_A | 1G3J_A_B | 4GN5_D_A | 5BXV_A_B | 4ZQD_A_B |
| 3AON_A_B | 3SFV_A_B | 1DHK_A_B | 3IDB_B_A | 4GOJ_A_B | 3WHL_C_A | 2V1D_B_A |



|          |          |          |          |          |          |          |
|----------|----------|----------|----------|----------|----------|----------|
| 1TY4_A_B | 4U30_A_B | 4D0G_A_C | 2EQB_A_B | 3H7W_B_A | 4IZ7_A_B | 3S48_B_A |
| 1GUX_A_B | 3SGJ_A_B | 4UXN_B_A | 3CPH_A_G | 4CZZ_B_A | 2J59_A_B | 1KSG_A_B |
| 4ISL_A_B | 4WWI_A_B | 1X3W_B_A | 2QWQ_A_B | 2QVS_B_E | 2YHO_B_A | 3E20_A_B |
| 2ERH_A_B | 1C1Y_A_B | 4C9R_C_A | 2Y69_Y_N | 4D18_M_N | 7LF7_B_A | 1TMQ_A_B |
| 2D7C_A_B | 3LAQ_B_A | 4XT1_A_B | 2OMX_A_B | 4IAO_A_B | 4C2V_A_B | 1R6Q_A_B |
| 3IM4_A_B | 4YFD_A_B | 1LE8_B_A | 2C5L_A_B | 1RKE_A_B | 3HMX_B_A | 4V0X_A_B |
| 4ZP4_A_B | 5JEN_B_A | 6O02_B_A | 4BRU_A_B | 4H6J_B_A | 4IZ5_A_B | 7B4W_A_B |
| 1AUI_A_B | 4KBA_A_B | 1GUA_A_B | 1TH1_A_B | 2WWX_A_B | 4EHP_A_B | 3UKW_B_C |
| 2JET_C_A | 5D3I_A_B | 7XGG_A_B | 4AFZ_C_A | 3ESW_B_A | 5D1M_A_B | 3L1Z_A_B |
| 3ZL7_A_C | 1V18_A_B | 2OZA_B_A | 4JEU_B_A | 1FR2_A_B | 6O03_B_A | 2EFC_B_A |
| 2WAX_A_B | 3VZ9_B_D | 4XT3_A_B | 1MZ8_A_B | 2XA0_A_B | 3QHT_C_A | 1O9K_A_B |
| 1R8Q_A_B | 2C1M_A_B | 1TBR_S_H | 3EG9_A_B | 3MHS_B_C | 3SQB_A_B | 1GH6_B_A |
| 2PMZ_E_K | 7DNE_A_B | 3BH7_A_B | 4EN2_B_A | 4F3L_B_A | 2J3W_D_A | 2P58_A_C |
| 3KUC_A_B | 1F34_A_B | 2P58_C_A | 1HR6_B_A | 6S9O_A_B | 7QTW_B_A | 3HCT_B_A |
| 5WHE_A_B | 3ZMU_B_A | 1L1O_D_A | 4YYP_A_B | 1I7W_D_A | 1A0R_B_G | 2BKK_B_A |
| 3AWU_A_B | 3K9O_A_B | 4H4K_A_C | 4OWP_B_A | 6S8R_A_B | 5CLL_A_B | 4P57_A_B |
| 4QPL_B_A | 2WG3_A_B | 3UKX_B_C | 2FSE_A_B | 3ZEF_A_B | 2O8G_A_B | 5C46_F_E |
| 2QL2_B_A | 3CH5_A_B | 3H82_B_A | 3CUE_L_A | 3SIU_A_B | 2J3T_A_B | 1MBU_A_B |
| 4X6Q_B_C | 4UEB_A_B | 4UED_A_B | 4JVS_B_A | 4UVC_B_A | 7ZYU_B_A | 2GZF_A_B |
| 2AW2_A_B | 3PCR_B_A | 4YH7_A_B | 2ZMZ_A_B | 4CCG_A_B | 5CM9_C_A | 1AWC_A_B |
| 2H32_B_A | 1QGR_A_B | 4W4K_B_A | 5IJ7_F_A | 6FP7_B_A | 1N2D_C_A | 4A49_B_A |
| 1BML_A_B | 3GLI_F_A | 4ROD_B_A | 5SZH_B_A | 1IBR_A_B | 3EJE_A_B | 4P5K_A_B |
| 6REQ_A_B | 1WXC_A_B | 4RWS_A_C | 1Y8X_A_B | 4B8A_A_B | 7PBP_E_A | 3WOF_A_B |
| 1YRN_B_A | 4I6N_A_B | 6QG8_A_B | 4GS7_A_B | 1ZNV_A_B | 4RE1_A_B | 4L0Z_B_A |
| 4AFQ_C_A | 2A5F_A_B | 4G91_B_A | 4UV9_B_A | 3QQ8_A_B | 4QXA_A_B | 4XLR_C_A |
| 2Y69_P_N | 6P4B_A_B | 1LDJ_A_B | 1S9D_A_E | 4AXG_A_B | 4I43_A_B | 4Y99_A_B |
| 6O9I_B_A | 2OMT_A_B | 3L3O_B_A | 4XYD_B_A | 6GFX_B_A | 3FDL_A_B | 4JE4_B_A |
| 2YPB_A_B | 1KMI_Y_Z | 5OTT_B_A | 4LLQ_B_A | 3K2M_C_A | 3E9J_B_C | 4CDK_A_B |
| 1YHN_A_B | 2GL7_A_B | 4AF3_A_D | 4RIY_A_B | 3K7V_C_A | 1AVF_A_J | 1XHM_A_B |

|          |          |          |          |          |          |          |
|----------|----------|----------|----------|----------|----------|----------|
| 2ES4_B_A | 1WWW_V_W | 4G01_B_A | 3OJY_A_B | 5CM8_B_A | 3L33_E_A | 3O4O_A_C |
| 1JDH_A_B | 2FYU_A_K | 3UKZ_B_C | 2QWO_A_B | 5DLQ_B_C | 1HR8_B_A | 2AHL_A_B |
| 2XJZ_A_B | 2GZI_A_B | 3PL7_A_B | 2QCS_B_A | 3ZTX_A_B | 4X6R_B_A | 3C59_B_A |
| 4PBV_C_A | 3TG1_A_B | 2XAF_B_A | 5JEJ_A_B | 2VLP_A_B | 1LUJ_A_B | 4WZ3_A_B |
| 2WAY_A_B | 1QUQ_B_A | 3RFZ_E_F | 4GAF_A_B | 1BH8_A_B | 2ODY_E_A | 2VLN_A_B |
| 2Y48_B_A | 4O8Y_B_A | 1MCT_A_I | 3GLI_A_B | 3R2D_A_B | 6ERE_A_B | 3REQ_A_B |
| 2Q5D_A_B | 4K5A_A_B | 4XZR_B_A | 2VLQ_A_B | 1NGM_I_A | 1R8S_A_E | 2J3R_A_B |
| 1FFT_F_A | 2P1L_E_A | 3ZMT_B_A | 1NH2_A_B | 3AOH_H_A | 3UZ0_B_A | 3SBT_B_A |
| 2PU9_A_B | 4O8X_B_A | 3E5A_A_B | 3OVU_C_A | 2YSU_B_A | 4UV8_B_A | 6MOE_A_B |
| 3LWW_A_  | 2RD7_A_C | 4GMJ_A_B | 3A37_A_B | 2QXV_A_B | 3ZKJ_E_A | 2FYU_A_G |
| B        |          |          |          |          |          |          |
| 4QJF_A_B | 2GZG_A_B | 2X0L_B_A | 5HXB_X_A | 4CC9_B_A | 3VR4_C_A | 2VLO_A_B |
| 4Z2M_B_G | 4XPN_A_B | 4ZJB_G_A | 2V5Q_C_A | 2Y69_N_P | 1TFX_C_A | 2Z7X_A_B |
| 4UEA_A_B | 3UOU_B_A | 4TXV_B_A | 4OL0_A_B | 5TAR_A_B | 2PVD_B_A | 4C2W_A_B |
| 1C9B_B_A | 4NRI_B_A | 4UHP_A_B | 1H91_I_E | 2BFX_A_B | 1DJ7_B_A | 4DIN_B_A |
| 3PVM_B_A | 2HSM_B_A | 5AJJ_B_A | 4D8D_A_B | 1ZJD_B_A | 4UAE_A_F | 2PUO_B_A |
| 2VRX_A_B | 4YR8_A_B | 6S9L_A_B | 3PVB_B_A | 3WO3_A_B | 3FEX_C_A | 6HTF_B_A |
| 3TJZ_A_B | 2ZWD_A_B | 2XBB_A_B | 2PI2_E_A | 2QWR_A_B | 1HTR_B_P | 3TDU_C_A |
| 4ROC_B_A | 4UF5_A_B | 1ZOQ_A_B | 3TNP_B_C | 2OMY_A_B | 4Z2M_B_I | 3W5V_B_A |
| 4D18_M_J | 3OG6_B_A | 1T6B_X_Y | 6LBX_A_B | 1O6S_A_B | 6S9N_A_B | 2A5G_A_B |
| 3JUA_A_B | 4GOK_A_B | 4ISN_A_B | 1BX2_A_B | 3DDC_A_B | 3KWV_D_A | 1U6H_A_B |
| 2A5D_A_B | 3RZW_A_B | 4UAF_B_E | 2FYU_A_C | 5VK3_A_B | 5EE5_B_A | 2XAG_B_A |
| 8A8C_A_B | 4C4P_A_B | 3D2F_B_A | 4DCN_A_B | 3W3A_A_B | 4AFU_C_A | 6XUN_B_A |
| 3NY7_B_A | 2CO6_B_A | 3D3C_B_A | 4Z2M_H_B | 4ISO_A_B | 2AST_C_A | 4L6W_A_B |
| 5CYZ_A_C | 1NH2_A_C | 4UAD_A_E | 3IOZ_A_B | 3W5U_H_A | 3V89_B_A | 5H6Q_B_A |
| 2REQ_A_B | 1KDQ_B_A | 2CO7_B_A | 5LDD_C_A | 4BRW_A_B | 1KSJ_A_B | 3F1P_B_A |
| 3W31_B_A | 3IXT_A_B | 2UXX_B_A | 6GR8_A_B | 1M56_I_B | 2PSM_A_B | 2DCU_A_B |
| 3WFD_C_B | 4K5B_A_B | 4NR3_B_A | 2Y69_N_S | 3QWQ_A_B | 3C98_B_A | 3C7N_B_A |
| 3KXC_A_C | 1JQL_B_A | 2GZJ_A_B | 1F45_A_B | 4IG7_A_B | 4CT4_A_B | 5WHA_A_B |

|          |          |          |          |          |          |          |
|----------|----------|----------|----------|----------|----------|----------|
| 4UVA_B_A | 2Y69_A_T | 7REQ_A_B | 1GAQ_B_A | 6GFY_B_A | 4HPM_C_A | 3TJZ_B_A |
| 3VR4_G_A | 4ZJV_A_B | 4GHI_B_A | 2XAQ_B_A | 4Z8L_E_A | 5VID_F_A | 2OMW_A_B |
| 3VON_B_A | 4B8M_A_B | 1M45_B_A | 3EGG_A_B | 2GZE_A_B | 2VGP_A_B | 5WHB_A_B |
| 2AHK_A_B | 1VG9_B_A | 6YWC_B_A | 3W3A_D_A | 2Y69_S_N | 2VE7_D_A | 2XJY_A_B |
| 3F1O_B_A | 3W1S_A_B | 1ITB_A_B | 3GYM_A_B | 2BFY_A_B | 7DNF_A_B | 7DNG_A_B |
| 1WX4_A_B | 2Y69_D_A | 3ICQ_B_C | 2EFE_B_A | 5IFS_B_A | 1P57_B_A | 2P58_A_B |
| 3U43_A_B | 5D1K_A_B | 1Z0J_A_B | 1B8M_A_B | 4UVB_B_A | 4UEL_A_B | 3AWS_A_B |
| 5LDD_B_C | 3ZN0_B_A | 3ZS9_A_B | 2RF9_A_B | 1VRS_B_A | 1UUZ_C_A | 6FPA_A_B |
| 4P4R_A_B | 4UE8_A_B | 2P22_A_C | 2GYK_A_B | 4RIW_A_B | 1ZVZ_A_B | 2ZMX_A_B |
| 6ER6_A_B | 1HR9_B_A | 1K8R_A_B | 4JEH_B_A | 6XOD_A_B | 4ANI_C_A | 4CSR_A_B |
| 3V11_A_B | 3HD7_F_A | 4WLQ_A_B | 1SQ2_L_N | 3WO3_B_A | 4IZA_A_B | 1JAT_A_B |
| 1Y01_B_A | 3WYG_A_C | 5AIE_B_A | 6O9H_B_A | 3IFQ_A_B | 1UJZ_A_B | 2FD6_U_A |
| 1REQ_A_B | 6S9M_A_B | 4ZPK_A_B | 4KHA_A_B | 4EMZ_A_B | 4NUT_A_B | 2QWN_A_B |
| 1PQ1_A_B | 2FU5_C_A | 4CJ2_A_B | 4E17_A_B | 5JDO_E_A | 3UL0_B_C | 3GKL_A_B |
| 2FYU_K_A | 1ZW3_A_B | 1EAY_A_B | 7P33_F_A | 4BAY_B_A | 3TX7_A_B | 5FUG_D_A |
| 1E44_B_A | 2O8A_A_B | 4IP3_B_A | 3BH6_A_B | 1QZ7_A_B | 1IYJ_B_A | 7Z7C_A_B |
| 3REA_A_B | 3TNF_A_B | 1MDM_B_A | 4WSI_X_A | 4EKX_B_A | 5FC8_E_C | 3MP7_A_B |
| 5Z2Q_A_B | 6P4A_C_H | 1M1E_A_B | 2PU9_B_A | 3ZU7_B_A | 5INB_A_B | 4E18_A_B |
| 4L4J_A_B | 3VR4_D_A | 4KUM_B_A | 5HZK_D_A | 1YDI_A_B | 2UZY_A_B | 4IC7_A_B |
| 1BUH_B_A | 1A2X_A_B | 2EFD_B_A | 2OCF_D_A | 2OMU_A_B | 5ZAU_A_B | 1ZR0_B_A |
| 5T5W_B_C | 1O6O_C_A | 3KND_A_B | 1EAW_A_B | 5REQ_A_B | 3WTP_C_A | 3F1N_B_A |
| 3NMU_C_B | 3FHI_B_A | 4S0T_A_B | 1A2X_B_A | 1B8M_B_A | 1BND_B_A | 1BQL_Y_H |
| 1BQL_Y_L | 1BRC_E_I | 1BVN_P_T | 1BXI_B_A | 1EMV_B_A | 1F2S_B_A | 1F45_B_A |
| 1FR2_B_A | 1GO3_E_F | 1H9H_E_I | 1IBR_B_A | 1IRA_X_Y | 1KI1_B_A | 1M56_B_A |
| 1MCV_I_A | 1O5E_L_H | 1O5F_L_H | 1PPE_I_E | 1QGE_D_E | 1UKV_G_Y | 2BCG_Y_G |
| 2BTC_E_I | 2F3C_E_I | 2GYK_B_A | 2GZE_B_A | 2GZF_B_A | 2GZG_B_A | 2GZI_B_A |
| 2GZJ_B_A | 2PMZ_P_Q | 2QSH_X_A | 2STA_I_E | 2STB_I_E | 2VLN_B_A | 2VLO_B_A |
| 2VLP_B_A | 2VLQ_B_A | 2WPT_B_A | 3BT1_B_A | 3CF6_R_E | 3D3B_J_A | 3HO5_H_B |
| 3IFQ_C_A | 3MZW_B_A | 3NC1_A_C | 3P71_T_C | 3QWQ_B_A | 3REA_B_A | 3RLF_A_B |

|          |          |          |          |          |          |          |
|----------|----------|----------|----------|----------|----------|----------|
| 3UYO_D_A | 3VZ9_B_D | 3VZA_C_A | 3WO4_B_A | 4AG1_C_A | 4CIN_B_A | 4D8D_B_A |
| 4EMZ_E_A | 4FMD_F_A | 4HRL_A_C | 4K5A_B_A | 4K5B_C_A | 4K8R_L_H | 4MGI_E_R |
| 4MGK_R_E | 4MGY_R_E | 4MGZ_R_E | 4N9G_B_A | 4Q5U_C_A | 4QVE_B_A | 4R6U_B_A |
| 4RIW_B_A | 4RIY_B_A | 4U32_A_X | 4U6Y_B_A | 4URU_R_S | 4URV_R_S | 4URW_R_S |
| 4URX_R_S | 4URY_R_S | 4URZ_R_S | 4US0_R_S | 4US1_R_S | 4US2_R_S | 4Y99_C_B |
| 4YII_A_U | 4YIR_X_A | 4YQX_L_A | 5DLQ_B_A | 5FUG_K_J | 5Z2Q_B_A | 6ER6_B_A |
| 6ERE_A_B | 6O9I_E_D | 6P4A_L_H | 6P4B_C_A | 6P4C_L_H | 6XTG_L_H | 6XUD_L_H |
| 6XUK_L_H | 7B4T_A_B | 7R9D_L_H | 7URX_L_H |          |          |          |

---

## (2) Folddock set<sup>3,4</sup>:

**Table S3: The list of protein-protein complexes in Folddock set**

|           |          |          |          |          |          |          |
|-----------|----------|----------|----------|----------|----------|----------|
| 3G5O_C_D  | 3EGW_B_C | 4P78_A_D | 5N9J_E_C | 3NCE_A_B | 3MHS_A_E | 4WEM_A_B |
| 2FM8_A_C  | 2PF4_H_D | 1OQE_I_Q | 3TUI_C_A | 3LVK_A_B | 4FOU_A_C | 1OFH_A_G |
| 5LDD_C_B  | 5T59_A_B | 1H3O_A_B | 3C0T_A_B | 7EIV_A_C | 1N6J_G_A | 2Y69_N_S |
| 3HTK_B_C  | 4Z96_C_A | 5T59_A_C | 5J1S_A_B | 2Y69_N_P | 2F8X_C_K | 1IAR_A_B |
| 5T5I_B_A  | 4U7U_A_K | 4CMM_A_B | 3H0G_N_U | 5MB9_A_D | 4A8X_A_C | 1I7Q_D_C |
| 1WVE_A_C  | 2WP0_B_D | 3HRD_A_D | 4OO1_H_J | 5LSJ_C_Q | 4WJ3_H_I | 5AWF_B_D |
| 2FTK_A_E  | 3GQI_B_A | 2CLY_B_C | 3RNQ_A_B | 4GAM_I_M | 4WQO_D_A | 3R84_U_V |
| 5LG4_A_B  | 5VOB_A_B | 1NH2_A_D | 2R6A_C_B | 3D6N_B_A | 1KF6_N_M | 4DAY_C_A |
| 4UB8_A_I  | 4Z2M_B_I | 3U6X_Y_D | 5L6W_C_L | 1CI6_B_A | 3T5V_C_B | 3JQO_I_k |
| 1J34_A_C  | 2NS1_B_A | 2Y69_P_N | 4RT6_B_A | 3EUH_A_C | 2G48_B_D | 5LDD_B_A |
| 2I2X_I_J  | 1IS8_H_S | 1ES7_A_B | 2J56_H_A | 2PMZ_Q_W | 2WDQ_B_C | 5DMV_D_C |
| 4UI1_A_D  | 4NWP_E_C | 5T5I_D_B | 2Y69_B_E | 4UFR_A_B | 4FAO_M_Q | 4KT5_A_C |
| 4DI3_C_E  | 4Q2U_B_A | 2Y69_B_I | 5HY3_A_B | 4J7C_B_K | 5IBW_C_A | 5FU7_E_G |
| 3CF4_A_G  | 5IUK_E_F | 3KFU_I_B | 3MHS_E_B | 4JLQ_A_B | 4RS1_A_B | 3TND_B_A |
| 3VYT_A_B  | 4UB8_B_L | 5UFU_B_A | 4FXE_B_E | 3NFG_D_C | 4H44_B_C | 3KXE_C_A |
| 5B2G_D_C  | 3GZ2_P_B | 2F4M_B_A | 3MHS_A_D | 5F5T_C_A | 4EOZ_C_D | 5AWF_D_B |
| 5B0O_G_C  | 3N9N_C_A | 5ABV_F_E | 4DJD_F_B | 1JR3_E_B | 3D6N_A_B | 4FQ3_A_B |
| 1PB_Y_C_A | 5N9J_U_Z | 5WXM_B_V | 2Y69_Y_N | 3JQO_k_l | 5UFU_A_B | 3VYT_B_C |
| 4Z2M_B_G  | 3T97_C_B | 1YAR_C_S | 2AW2_A_B | 2FYU_A_K | 5L9W_A_C | 2FYU_A_G |
| 5J9T_F_H  | 5V6T_A_B | 4JLQ_B_A | 1JB0_C_A | 1NH2_A_B | 2Y69_E_I | 2Y69_O_U |
| 4A8X_B_A  | 5IM5_A_N | 4D18_B_F | 1G1X_C_A | 4DX8_B_H | 4M70_I_J | 2F9I_B_A |
| 4OWT_A_C  | 5LSK_P_N | 4F0Z_C_B | 2CLY_D_E | 2Y69_A_M | 1BOU_B_A | 5DOQ_B_A |

|          |          |          |          |          |          |          |
|----------|----------|----------|----------|----------|----------|----------|
| 5I9E_A_E | 3KFU_B_I | 1H59_A_B | 1UB4_A_C | 3O4O_A_B | 4B7Y_C_A | 5T5I_F_B |
| 2ZP8_B_G | 1M56_I_B | 5LSB_A_B | 4UB8_Y_Z | 1EEX_L_M | 2CZV_A_C | 1ZAV_A_V |
| 2QFA_A_B | 3L75_R_T | 3RZO_C_J | 5N9J_W_U | 5J1S_B_A | 5FVD_A_B | 4AQR_A_D |
| 2XPI_B_A | 3KZ4_H_B | 1IKN_A_D | 5BNX_C_B | 3TJZ_B_A | 5CCB_A_B | 3U6X_D_Y |
| 1L1O_D_A | 2FYU_C_E | 5N9J_A_D | 4B8C_H_C | 4A8J_E_D | 4Z80_C_A | 3U88_C_M |
| 4H44_A_D | 5N9J_G_B | 4FAO_d_b | 4ODB_E_B | 4BV4_M_R | 4H44_A_B | 4CCN_D_B |
| 1ORY_B_A | 4Z6Y_A_D | 5WGB_B_A | 5IMT_A_D | 1GO4_F_B | 5F5T_A_C | 5T59_C_A |
| 5LSJ_G_E | 2ZZD_L_J | 3W15_A_C | 3M9S_F_3 | 2IVF_C_B | 2J56_H_L | 3F3F_D_B |
| 5O7X_I_G | 1SXJ_G_B | 2VPZ_G_F | 3TVT_A_B | 2FYU_I_A | 5MSM_A_B | 4DAY_A_C |
| 2AQ2_A_B | 3A5Z_C_D | 4JCV_C_E | 3X1L_G_D | 4NWO_A_B | 4U4C_A_B | 4WWX_E_Y |
| 1PRT_K_G | 2QFA_B_C | 4CFR_B_Q | 1NBW_A_B | 2FYU_A_I | 5N9J_W_S | 3MHS_C_A |
| 5LDA_A_B | 1GNG_A_X | 1NH2_A_C | 7K01_1_6 | 5LSJ_C_G | 1YAR_S_C | 2Y69_S_P |
| 5AAW_Y_G | 1Q90_D_C | 4UB8_E_R | 4D18_A_F | 4I9X_C_B | 5LDD_C_A | 4Z2M_H_B |
| 5VJI_D_F | 5NT7_C_D | 4OJK_C_A | 5J9T_B_C | 5N9J_B_C | 2PT7_D_H | 2ARP_A_F |
| 3WWN_A_B | 3VIQ_A_B | 4JHJ_C_A | 4LNU_A_K | 4ZRP_C_A | 5JA4_B_D | 5HXG_D_C |
| 5K23_A_C | 5AAW_Y_E | 5DMV_C_D | 5E8J_B_D | 1PRT_E_F | 4UQI_A_M | 4XWJ_A_B |
| 3TJZ_C_B | 1UF2_K_A | 5LTW_F_G | 1HBX_G_B | 5HK5_E_A | 3IAX_B_A | 5JPO_E_A |
| 2Y69_P_S | 4HI0_A_B | 3N9U_B_C | 1XDT_R_T | 1PXV_B_D | 1XOU_A_B | 7M5F_B_A |
| 5BWA_B_A | 2PMZ_B_P | 2PMZ_K_C | 3S8G_A_C | 5FIR_D_C | 3KFU_H_I | 4JIN_F_L |
| 2B4J_A_D | 5T89_V_X | 3RZO_B_K | 4ZRK_G_C | 5GQQ_B_D | 4H44_C_E | 5LSJ_D_B |
| 2Z5K_B_A | 3MK7_D_E | 2Q86_C_D | 4D18_I_J | 2Y69_G_C | 4HSA_F_E | 5F5P_E_G |
| 5O7X_G_H | 4XGC_C_F | 1B33_N_E | 1XDT_T_R | 2VPZ_A_B | 4H44_B_G | 2J56_L_H |
| 3TND_A_B | 1XF6_A_C | 5T5I_A_B | 4H44_A_G | 3WWN_B_A | 4IFD_C_J | 4IFD_C_I |
| 4WNL_E_D | 1QS0_B_A | 3T12_C_A | 3VA2_C_A | 3VU9_A_B | 3UTM_C_B | 2FYU_G_D |
| 5K04_A_B | 4XGC_F_C | 5LSK_N_P | 3TUJ_A_C | 3TJZ_A_B | 3A0R_A_B | 5T5I_K_J |
| 3M4W_A_E | 1GL2_A_D | 2XKO_C_B | 3NMU_C_A | 1JB0_D_L | 1YFN_A_E | 5ET0_D_C |
| 5HY3_B_A | 3FBI_A_B | 5LXT_A_F | 2PMZ_H_A | 2ZXX_F_E | 5FFO_A_G | 4M5D_A_B |
| 4F0Z_A_B | 3X1L_A_F | 1OR7_B_F | 5BNX_A_D | 4OO1_C_J | 4U7U_U_P | 2JF1_A_T |
| 5IIB_A_B | 5N9J_A_B | 2IVF_A_B | 5IFG_A_B | 5B2G_F_A | 3RZO_C_L | 2F8X_K_C |
| 1Q90_A_R | 2BA1_E_B | 3PXG_f_F | 3ULY_B_A | 4CO6_C_E | 5O7X_E_F | 2PU9_A_B |
| 6VN1_A_H | 3UTM_B_C | 5I2D_F_G | 3KFD_J_A | 4QPG_C_A | 3R45_A_C | 3PNL_A_B |
| 3TNU_A_B | 3K51_B_A | 4IIT_A_B | 2FYU_C_G | 3KXE_A_C | 4YYP_A_B | 3VEP_C_A |
| 4HFK_A_B | 4U7U_M_V | 3BPO_C_B | 5X1E_A_C | 3AYH_B_A | 1GXD_A_C | 1PRT_D_B |
| 4ZRI_C_A | 4LD3_B_A | 5I2D_A_H | 5N9J_B_G | 4E6K_D_H | 4XGC_C_E | 1LRW_B_A |
| 5FU7_B_A | 3BK3_C_A | 5V3N_A_B | 3R84_V_U | 5N9J_D_G | 4H44_G_B | 1IK9_A_C |
| 1EXB_A_E | 2Y69_C_G | 3U60_G_C | 5NLB_B_A | 2QOO_A_C | 5UA4_A_B | 3CL3_A_D |
| 3TVT_B_A | 5E8J_D_B | 5BS7_C_E | 5WXM_V_B | 2HTM_G_C | 3BRV_B_C | 4PUF_B_D |
| 5ABV_E_F | 4EBA_H_C | 5WYL_C_D | 3NFG_C_D | 2P22_A_C | 5FM5_M_P | 5IUK_F_E |

|          |          |          |          |          |          |          |
|----------|----------|----------|----------|----------|----------|----------|
| 4H44_B_A | 4GAM_C_B | 1YA5_B_T | 5FFO_B_D | 4D18_F_A | 3KFD_G_K | 4UB8_A_B |
| 2NQ2_A_C | 4UB8_I_A | 1WVE_C_A | 2BQ1_E_I | 3IKO_H_I | 4UQI_B_S | 1PRT_F_E |
| 5N6Y_A_C | 2F8X_C_M | 1KF6_B_D | 1YKH_A_B | 2Y69_D_E | 4UB8_T_A | 4UB8_K_Y |
| 5JAA_D_A | 5T70_A_G | 4XIZ_A_N | 2QFA_B_A | 1H2S_A_B | 4HZU_S_T | 5N9J_R_G |
| 4UB8_A_O | 5F5S_A_B | 2Y69_A_B | 4U65_A_E | 3OIQ_A_B | 5IM5_N_A | 4OMF_A_G |
| 3BES_R_L | 4XPM_C_A | 5KTB_B_C | 5T5I_J_K | 5FFO_G_A | 5T5W_B_C | 1GL2_A_B |
| 4CYM_A_D | 4G2V_A_B | 4A8X_A_B | 5BQC_A_B | 4U7U_W_V | 1EEX_M_L | 4XB6_H_G |
| 5TCS_C_A | 3NMU_F_A | 4DL0_G_E | 5H2F_F_J | 2FYU_J_K | 4XGC_C_B | 4FAO_Q_M |
| 1YKH_B_A | 3SJL_B_E | 2ZME_B_D | 4H63_R_V | 2P22_A_D | 4OWT_A_B | 1N6J_A_G |
| 3X1L_A_C | 1JB0_D_C | 3NMZ_A_C | 5T5I_B_G | 5O32_J_F | 3H0G_L_B | 2ZXX_E_F |
| 3BG1_A_B | 5FU7_G_E | 2DOQ_B_D | 5VOB_B_D | 2NPS_D_A | 1KKM_A_I | 5B58_T_B |
| 7QIH_A_D | 2P58_C_A | 3HUG_I_J | 4NTW_B_A | 3DIN_C_A | 5FIR_C_D | 1UW4_D_C |
| 4CYM_D_A | 4KP3_A_C | 5BNX_B_C | 5FM5_P_M | 5L6W_L_C | 3VA2_A_C | 5N9J_B_E |
| 1JB0_F_J | 3T5V_B_C | 3INB_A_D | 2NN6_I_F | 4DCK_A_C | 3U60_C_G | 2D1P_D_F |
| 5JHF_E_F | 5N9J_A_R | 1W85_I_B | 1J34_C_A | 4DXR_A_B | 2IZV_A_C | 4UB8_A_T |
| 3ISM_C_A | 1GHQ_A_B | 1JB0_A_D | 4XWJ_B_A | 5LOP_A_C | 1L1O_B_C | 2ARP_F_A |
| 5EKQ_A_E | 5O7X_F_E | 1P9M_B_C | 2FMM_C_E | 5F74_B_A | 2PT7_H_D | 4PKF_A_C |
| 3FWB_A_B | 2IJ0_B_C | 4XHJ_B_A | 4GAM_B_C | 5MU7_A_B | 3TIX_A_B | 5N9J_A_E |
| 2PMZ_B_N | 4XPM_A_B | 4P1B_A_I | 1TTW_A_B | 3LCB_B_C | 4N3Y_A_C | 1QS0_A_B |
| 2Y69_U_O | 4IIT_B_A | 4D18_E_H | 4OWR_A_C | 4DL0_C_G | 5N9J_G_E | 3RLF_E_G |
| 7EL1_A_E | 3EAB_G_A | 2WJV_B_E | 4UB8_B_H | 3GZ2_B_P | 5LSJ_A_D | 2CLY_C_A |
| 3M4W_E_A | 1CCW_D_C | 4ZHY_B_A | 3C0T_B_A | 5JW7_A_B | 1LTS_C_E | 5LSI_D_E |
| 7QIH_A_B | 3HRD_H_F | 4YMU_C_J | 4ME7_C_F | 3X1L_B_C | 3GQI_A_B | 4MCT_A_B |
| 4JMF_B_A | 1EEX_L_E | 2V53_A_D | 1SR4_B_A | 1TH8_A_B | 3U52_E_A | 3U7U_D_J |
| 5X1E_C_A | 5F0J_B_A | 3QKS_A_C | 3RFZ_E_F | 1KF6_N_O | 3VEP_A_C | 3N9U_C_B |
| 2NV2_K_L | 4G4S_O_P | 5N9J_B_A | 2IZV_C_A | 2Y69_A_T | 5T89_X_V | 1NH2_D_C |
| 4XGC_A_D | 4B8C_C_H | 4JMF_A_B | 5JWO_B_A | 2VPZ_F_G | 4U4C_B_A | 3L75_S_Q |
| 2OZ4_H_A | 5DLQ_B_C | 1KF6_D_C | 4YMU_J_C | 5F0J_B_C | 7NJ0_A_C | 3OIQ_B_A |
| 3DIN_A_C | 5MSM_B_C | 3M9S_3_F | 3N9N_A_C | 3D31_C_A | 2FYU_D_H | 2NPS_C_D |
| 3DBO_B_A | 4D18_M_J | 4H63_V_R | 5N9J_U_W | 1G1X_A_C | 2FYU_K_A | 2AZE_C_B |
| 4UB8_U_B | 4H9N_A_C | 2PQN_B_A | 4KT5_C_A | 1XOU_B_A | 4D18_M_N | 2RDD_B_A |
| 4GF3_A_B | 2ZZD_J_L | 3RFZ_F_E | 4NRH_A_D | 5JA4_D_B | 5N9J_A_W | 1LRW_A_B |
| 2BQ1_I_E | 1UF2_A_K | 3O6Q_D_A | 4QLP_B_A | 5KBX_A_B | 4DL0_E_I | 5F4E_B_A |
| 4X8K_A_B | 2IZO_A_C | 3PNL_B_A | 4XGC_A_B | 4XGC_B_E | 5T5I_B_F | 5I2D_G_F |
| 2A6Q_C_F | 5HU3_B_A | 1XKP_A_C | 3H0G_B_J | 5KWY_C_B | 2PMZ_H_K | 4B7Y_A_C |
| 4I98_A_C | 5DA9_A_C | 2BRQ_A_C | 5DLQ_B_F | 4WJ3_A_P | 4KP3_B_F | 2RDD_A_B |
| 2QFA_C_A | 3BOW_B_C | 1JB0_A_F | 3AYH_A_B | 2XZE_A_Q | 2FYU_A_C | 1JNR_A_B |
| 2PMZ_K_H | 2WIU_C_D | 3KFU_H_J | 4DCK_C_A | 3D31_A_C | 4IN3_D_C | 4LD3_A_B |

|          |           |          |          |          |          |          |
|----------|-----------|----------|----------|----------|----------|----------|
| 1JB0_A_E | 2XKO_B_C  | 4UB8_A_V | 3P8C_B_F | 2CLY_A_C | 2J12_B_A | 3KP1_E_A |
| 4IFD_I_C | 2WJN_L_H  | 5B5W_A_U | 5TDY_C_D | 3KFD_B_F | 4JOI_B_C | 3MHS_A_B |
| 4NRH_D_A | 2WJV_E_B  | 5EOF_B_C | 3DIN_A_E | 2P22_A_B | 5NVL_D_C | 2PMZ_E_K |
| 4H44_F_G | 3M91_A_B  | 3OC3_C_A | 4BSZ_A_B | 117Q_C_D | 7LDG_A_B | 5T5W_C_A |
| 5F1B_C_A | 2J56_A_H  | 2V5P_B_C | 2WJN_L_C | 3PHF_3_4 | 3W15_C_A | 5DMB_A_D |
| 3L75_E_J | 6R17_B_A  | 1W85_C_D | 3A5Z_D_C | 5O7X_H_G | 5CGQ_B_A | 3N3A_B_C |
| 4LL1_A_B | 3H0G_B_L  | 3A0R_B_A | 3U52_A_E | 4CRY_B_G | 3O4O_B_A | 1GHQ_B_A |
| 3MHS_B_E | 2Y69_X_Q  | 1TII_C_E | 4RT6_A_B | 3MMY_C_D | 5F0J_C_A | 2J56_L_A |
| 5IXI_B_A | 5UK4_n_N  | 2P58_A_B | 2PMZ_P_B | 3S8G_A_B | 5B64_A_B | 5D6H_A_B |
| 4CRY_G_B | 5LGD_A_B  | 4H44_G_A | 3ALZ_A_B | 3RZO_C_K | 11S8_S_H | 2PMZ_C_K |
| 4QAF_A_D | 3NMU_C_B  | 5GK9_A_B | 3S8G_C_B | 4BFI_A_B | 4WJ3_K_M | 4WZA_D_H |
| 5H2F_J_F | 5JW9_A_B  | 5T59_E_F | 3HRD_H_G | 2NV2_L_K | 1L0O_B_C | 6VN1_B_A |
| 5VXZ_B_D | 5O7X_G_I  | 4JHJ_A_C | 4JJN_E_L | 5LXT_A_E | 1ORY_A_B | 1XU2_R_A |
| 2YFV_A_C | 2P58_A_C  | 2R6A_B_C | 5N9J_C_A | 4HKJ_N_P | 2AS5_F_N | 2PMZ_A_H |
| 4XGA_A_B | 2PF4_D_H  | 3AB0_E_D | 1KKM_I_A | 4PBY_B_D | 4TQU_M_Q | 5KBX_B_A |
| 6R17_A_C | 7QIH_B_A  | 2Y69_D_A | 2Y69_L_M | 7LDG_B_A | 4FAO_d_W | 2EQ7_B_C |
| 4B8C_A_D | 3HHZ_A_K  | 1GVN_C_D | 5G1X_A_B | 5LB7_A_B | 1GO4_B_F | 3N3A_C_B |
| 2BA1_B_E | 1SR4_A_B  | 2F4M_A_B | 5JFZ_E_F | 4XGC_D_A | 5LDD_B_C | 2P5T_E_F |
| 2FYU_F_C | 1JB0_D_A  | 4F0Z_A_C | 3GE3_A_C | 4AJ5_I_S | 5IXI_A_B | 5FU7_A_B |
| 3EAB_A_G | 5N9J_B_D  | 4ODB_B_E | 2Q7N_A_B | 5GJK_A_B | 5N9J_A_G | 3P8C_D_F |
| 4NTW_A_C | 4B8C_D_H  | 5M72_A_B | 4UB8_Y_K | 1P9M_A_B | 7QIH_D_A | 3CR3_B_D |
| 3RFZ_D_E | 4HI0_E_A  | 4ZRK_C_G | 1FYH_A_B | 3X1L_B_A | 3PIN_B_A | 1PRT_B_F |
| 5EP6_A_B | 2PU9_A_C  | 5N9J_Z_S | 4DJD_E_B | 2AVU_E_B | 1SXJ_B_G | 4OMF_B_A |
| 2PMZ_G_T | 4W4O_A_C  | 4XGC_E_C | 1U2G_B_C | 4ZK7_W_E | 4EBA_C_H | 5CGQ_A_B |
| 2Y69_I_E | 4XPM_C_B  | 1PRT_G_K | 5DLQ_F_B | 5FU7_A_D | 4IFD_A_G | 5T5W_B_A |
| 3L75_D_E | 4KP3_F_B  | 3L2O_B_A | 3KFD_F_B | 3MK7_E_F | 5F0J_A_C | 5FVD_B_A |
| 5EP6_B_A | 3L75_E_D  | 4Q2U_A_B | 1JB0_L_D | 1JR3_B_E | 5FFO_D_B | 5N9J_S_U |
| 5LGD_B_A | 3MZK_C_D  | 2F8X_K_M | 5BNX_B_D | 5JPO_A_E | 5UA4_B_A | 4XGC_A_E |
| 1OR7_F_B | 3S JL_B_F | 4HX3_G_H | 4XXB_A_B | 5BWA_A_B | 2WJN_H_L | 1TAF_B_A |
| 3L82_A_B | 3NMU_B_C  | 5N9J_A_S | 2W19_B_D | 5NLB_A_B | 5NT7_D_C | 5CX3_A_E |
| 3V5W_A_B | 2Y0N_A_E  | 5CSF_C_B | 3RKO_E_F | 3KFU_I_H | 3ZDL_B_A | 5UNI_B_A |
| 4UB8_u_o | 2PMZ_A_L  | 4WPX_A_B | 4LL8_E_A | 1TH8_B_A | 7UUS_I_J | 5T5I_C_A |
| 4U7U_B_E | 3O4O_B_C  | 3Q33_A_B | 1XRS_A_B | 2PU9_B_A | 2W19_D_B | 4XB6_B_D |
| 4NTW_A_B | 5FQ8_B_G  | 1FM0_D_E | 3LCB_C_B | 4UB8_j_e | 2Y69_A_D | 5GJK_B_A |
| 5N9J_E_G | 5LSJ_B_D  | 1ZT2_B_A | 7UBZ_A_B | 4J7C_K_B | 5WUR_A_C | 2Y69_N_Y |
| 2P58_B_C | 2ZXE_A_G  | 4UB8_U_V | 4QPG_A_C | 2PU9_C_A | 2Q0O_C_A | 7EIV_C_A |
| 2WDQ_E_F | 2WDQ_F_E  | 2FYU_C_D | 5BNX_A_C | 5N6Y_C_A | 5T59_B_A | 2PMZ_V_G |
| 5KL1_A_B | 4ZRP_A_C  | 6TMM_A_B | 3BK3_A_C | 2PMZ_G_V | 3MHS_B_C | 2Y69_S_N |

|           |          |          |          |          |          |          |
|-----------|----------|----------|----------|----------|----------|----------|
| 4ZRI_A_C  | 5KL1_B_A | 4H9N_B_C | 4NQW_B_A | 2GH0_C_A | 4JN_L_E  | 4UB8_B_O |
| 5N9J_G_S  | 3EGW_C_B | 3RZO_J_C | 3RZO_K_C | 3BRV_C_B | 5LPU_D_B | 1P9M_A_C |
| 1M56_D_C  | 2WDQ_C_B | 4Z80_A_C | 3NCE_B_A | 4IFD_G_I | 4L63_A_C | 3TQ7_Q_A |
| 4ZHY_A_B  | 5LXR_B_A | 4IFD_I_K | 2PJW_H_V | 4UB8_m_l | 2PQN_A_B | 4E6K_H_D |
| 4FAO_b_d  | 4GAM_L_I | 5T5W_A_C | 1B33_E_N | 4FBW_A_C | 3EUJ_A_B | 3O4O_A_C |
| 3IJ2_B_X  | 4WPX_B_A | 5FQ8_D_E | 1FXK_A_C | 3RLF_F_E | 4XB6_E_G | 5NXB_B_C |
| 2P5T_F_E  | 3X1L_D_G | 2AS5_N_F | 2QIY_A_C | 2QFA_C_B | 1JB0_C_D | 5J9T_C_D |
| 3WWT_A_B  | 1T0F_A_C | 1BOU_A_B | 1FYH_B_A | 1H2S_B_A | 1H59_B_A | 1IAR_B_A |
| 1JNR_B_A  | 1M56_B_A | 1NBW_B_A | 1M56_C_A | 1P9M_C_A | 1OFH_G_D | 1U2G_C_A |
| 1PB_Y_A_B | 1TAF_A_B | 1TTW_B_A | 1W85_B_A | 1XRS_B_A | 1ZT2_A_B | 2AQ2_B_A |
| 2AVU_B_A  | 2AW2_B_A | 2F9I_A_B | 2GH0_A_B | 2IVF_B_A | 2NS1_A_B | 2Q7N_B_A |
| 2VPZ_B_A  | 2ZXE_B_A | 3BG1_B_A | 3BPO_B_A | 3DBO_A_B | 3F3F_B_A | 3FBI_B_A |
| 3ISM_A_B  | 3K51_A_B | 3KFD_A_B | 3LVK_B_A | 3NMU_A_B | 3OC3_A_B | 3PIN_A_B |
| 3Q33_B_A  | 3RLF_A_B | 3RNQ_B_A | 3S8G_B_A | 3T12_A_B | 3T97_B_A | 3TNU_B_A |
| 3ULY_A_B  | 3V5W_B_A | 3VU9_B_A | 3WWT_B_A | 3ZDL_A_B | 4BFI_B_A | 4BSZ_B_A |
| 4CMM_B_A  | 4DJD_B_A | 4F0Z_B_A | 4FQ3_B_A | 4G2V_B_A | 4GF3_B_A | 4HFK_B_A |
| 4HI0_B_A  | 4I9X_B_A | 4LL1_B_A | 4M5D_B_A | 4MCT_B_A | 4NQW_A_B | 4NWO_B_A |
| 4OJK_A_B  | 4OWT_B_A | 4RS1_B_A | 4UFR_B_A | 4XGA_B_A | 4XHJ_A_B | 4XPM_B_A |
| 5B58_B_A  | 5BQC_B_A | 5CCB_B_A | 5D6H_B_A | 5MSM_B_A | 5DOQ_A_B | 5F1B_A_B |
| 5F4E_A_B  | 5HK5_A_B | 5IBW_A_B | 5IFG_B_A | 5JAA_A_B | 5K04_B_A | 5LDA_B_A |
| 5LG4_B_A  | 5LPU_B_A | 5MU7_B_A | 5UNI_A_B | 5WGB_A_B | 6TMM_B_A | 7M5F_A_B |
| 7UBZ_B_A  | 7K01_6_4 | 7UUS_J_I |          |          |          |          |

### (3) De novo set<sup>5-19</sup>:

Below is the De novo set list. Each row represents the PDB ID of a ligand-receptor complex, allowed by the count of correct residues, the count of interface residues, and the recovery of interface residues.

**Table S4 The list of protein-protein complexes in De novo set**

| PDB<br>ID_ligand_receptor | Count of correct<br>residues | Count of interface<br>residues | Recovery of<br>interface residues |
|---------------------------|------------------------------|--------------------------------|-----------------------------------|
| 3LHP_T_IM                 | 2                            | 19                             | 0.11                              |
| 3R2X_C_AB                 | 5                            | 18                             | 0.28                              |
| 3ZUV_B_A                  | 8                            | 19                             | 0.42                              |
| 4GLA_D_A                  | 11                           | 19                             | 0.58                              |
| 4GLV_B_D                  | 8                            | 18                             | 0.44                              |



|           |    |    |      |
|-----------|----|----|------|
| 4GN3_B_A  | 7  | 16 | 0.44 |
| 4GN4_B_A  | 10 | 18 | 0.56 |
| 4JW2_A_B  | 8  | 20 | 0.4  |
| 4JW2_B_A  | 7  | 18 | 0.39 |
| 4JW3_C_A  | 10 | 22 | 0.45 |
| 4N9G_C_AB | 8  | 17 | 0.47 |
| 5OOV_A_B  | 16 | 27 | 0.59 |
| 6BZX_A_B  | 19 | 44 | 0.43 |
| 6DKM_A_B  | 15 | 41 | 0.37 |
| 6DKM_B_A  | 9  | 36 | 0.25 |
| 6DLC_B_A  | 12 | 25 | 0.48 |
| 6DLM_A_B  | 18 | 38 | 0.47 |
| 6DLM_B_A  | 6  | 35 | 0.17 |
| 6DM9_A_B  | 23 | 42 | 0.55 |
| 6DM9_B_A  | 18 | 43 | 0.42 |
| 6DMA_A_B  | 12 | 34 | 0.35 |
| 6DMA_B_A  | 14 | 35 | 0.4  |
| 6DMP_A_B  | 18 | 47 | 0.38 |
| 6DMP_B_A  | 19 | 52 | 0.37 |
| 6F0F_B_A  | 12 | 21 | 0.57 |
| <hr/>     |    |    |      |
| 6F0G_C_A  | 10 | 19 | 0.53 |
| 6G4J_B_A  | 15 | 27 | 0.56 |
| 6GB1_B_A  | 5  | 18 | 0.28 |
| 6MBB_B_A  | 12 | 17 | 0.71 |
| 6MOK_A_B  | 7  | 29 | 0.24 |
| 6MOL_A_B  | 8  | 22 | 0.36 |
| 6NDZ_B_A  | 17 | 41 | 0.41 |
| 6NE1_B_A  | 22 | 35 | 0.63 |
| 6NE2_B_A  | 15 | 32 | 0.47 |
| 6VFH_A_B  | 4  | 13 | 0.31 |
| 6VFH_B_A  | 4  | 17 | 0.24 |
| 6VFI_A_B  | 10 | 23 | 0.43 |
| 6VFI_B_A  | 12 | 16 | 0.75 |
| 6VFJ_A_B  | 4  | 14 | 0.29 |
| 6VFJ_B_A  | 4  | 11 | 0.36 |
| 6WMK_A_B  | 8  | 21 | 0.38 |
| 6WMK_B_A  | 6  | 21 | 0.29 |
| 6WRW_C_A  | 12 | 23 | 0.52 |

|          |    |    |      |
|----------|----|----|------|
| 7A48_B_A | 4  | 15 | 0.27 |
| 7A4D_E_A | 18 | 37 | 0.49 |
| 7A4T_B_A | 16 | 18 | 0.89 |
| 7A50_B_A | 22 | 32 | 0.69 |
| 7F69_C_A | 7  | 13 | 0.54 |
| 7JZM_A_B | 7  | 17 | 0.41 |
| 7JZU_A_B | 6  | 20 | 0.3  |
| 7L5M_B_A | 23 | 45 | 0.51 |
| 7MWQ_D_C | 10 | 24 | 0.42 |
| 7MWR_A_B | 7  | 17 | 0.41 |
| 7UHB_K_C | 9  | 23 | 0.39 |
| 7VG7_B_A | 2  | 21 | 0.1  |
| 7XFR_B_A | 5  | 13 | 0.38 |
| 7XYQ_B_A | 8  | 21 | 0.38 |
| 7ZSD_P_M | 7  | 21 | 0.33 |
| 8AW4_A_B | 12 | 26 | 0.46 |
| 8AW4_B_A | 15 | 27 | 0.56 |
| 8DCE_H_A | 10 | 23 | 0.43 |
| 8DVN_B_A | 9  | 14 | 0.64 |

---

## Reference

1. S. Dey and E. D. Levy, PDB-wide identification of physiological hetero-oligomeric assemblies based on conserved quaternary structure geometry, *Structure*, 2021, **29**, 1303-1311.e1303.10.1016/j.str.2021.07.012
2. N. Sen and M. S. Madhusudhan, A structural database of chain–chain and domain–domain interfaces of proteins, *Protein Sci.*, 2022, **31**, e4406.10.1002/pro.4406
3. P. Bryant, G. Pozzati and A. Elofsson, Improved prediction of protein-protein interactions using AlphaFold2, *Nature Communications*, 2022, **13**, 1265.10.1038/s41467-022-28865-w
4. A. G. Green, H. Elhabashy, K. P. Brock, R. Maddamsetti, O. Kohlbacher and D. S. Marks, Large-scale discovery of protein interactions at residue resolution using co-evolution calculated from genomic sequences, *Nature Communications*, 2021, **12**, 1396.10.1038/s41467-021-21636-z
5. D. D. Sahtoe, A. Coscia, N. Mustafaoglu, L. M. Miller, D. Olal, I. Vulovic, T. Y. Yu, I. Goreschnik, Y. R. Lin, L. Clark, F. Busch, L. Stewart, V. H. Wysocki, D. E. Ingber, J. Abraham and D. Baker, Transferrin receptor targeting by de novo sheet extension, *Proceedings of the National Academy of Sciences of the United States of America*, 2021, **118**, e2021569118.10.1073/pnas.2021569118
6. M. Baek, F. DiMaio, I. Anishchenko, J. Dauparas, S. Ovchinnikov, G. R. Lee, J. Wang, Q. Cong, L. N. Kinch, R. D. Schaeffer, C. Millán, H. Park, C. Adams, C. R. Glassman, A. DeGiovanni, J. H. Pereira, A. V. Rodrigues, A. A. van Dijk, A. C. Ebrecht, D. J. Opperman, T. Sagmeister, C. Buhlheller, T. Pavkov-Keller, M. K. Rathinaswamy, U. Dalwadi, C. K. Yip, J. E. Burke, K. C. Garcia, N. V. Grishin, P. D. Adams, R. J. Read and D. Baker, Accurate prediction of protein structures and interactions using a three-track neural network, *Science*, 2021, **373**, 871-876.10.1126/science.abj8754
7. L. T. Dang, Y. Miao, A. Ha, K. Yuki, K. Park, C. Y. Janda, K. M. Jude, K. Mohan, N. Ha, M. Vallon, J. Yuan, J. G. Vilches-Moure, C. J. Kuo, K. C. Garcia and D. Baker, Receptor subtype discrimination using extensive shape complementary designed interfaces, *Nature Structural & Molecular Biology*, 2019, **26**, 407-414.10.1038/s41594-019-0224-z
8. P. Hosseinzadeh, P. R. Watson, T. W. Craven, X. Li, S. Rettie, F. Pardo-Avila, A. K. Bera, V. K. Mulligan, P. Lu, A. S. Ford, B. D. Weitzner, L. J. Stewart, A. P. Moyer, M. Di Piazza, J. G. Whalen, P. Greisen, Jr., D. W. Christianson and D. Baker, Anchor extension: a structure-guided approach to design cyclic peptides targeting enzyme active sites, *Nature Communications*, 2021, **12**, 3384.10.1038/s41467-021-23609-8
9. Y. K. Lau, V. Baytshtok, T. A. Howard, B. M. Fiala, J. M. Johnson, L. P. Carter, D. Baker, C. D. Lima and C. D. Bahl, Discovery and engineering of enhanced SUMO protease enzymes, *The Journal of biological chemistry*, 2018, **293**, 13224-13233.10.1074/jbc.RA118.004146
10. V. K. Mulligan, S. Workman, T. Sun, S. Rettie, X. Li, L. J. Worrall, T. W. Craven, D. T. King, P. Hosseinzadeh, A. M. Watkins, P. D. Renfrew, S. Guffy, J. W. Labonte, R. Moretti, R. Bonneau, N. C. J. Strynadka and D. Baker, Computationally designed peptide macrocycle inhibitors of New Delhi metallo- $\beta$ -lactamase 1, *Proceedings of the National Academy of Sciences of the United States of America*, 2021, **118**, e2012800118.10.1073/pnas.2012800118
11. S. J. Caldwell, I. C. Haydon, N. Piperidou, P. S. Huang, M. J. Bick, H. S. Sjöström, D. Hilvert, D. Baker and C. Zeymer, Tight and specific lanthanide binding in a de novo TIM barrel with a large internal cavity designed by symmetric domain fusion, *Proceedings of the National*

- Academy of Sciences of the United States of America*, 2020, **117**, 30362-30369.10.1073/pnas.2008535117
12. A. Quijano-Rubio, H. W. Yeh, J. Park, H. Lee, R. A. Langan, S. E. Boyken, M. J. Lajoie, L. Cao, C. M. Chow, M. C. Miranda, J. Wi, H. J. Hong, L. Stewart, B. H. Oh and D. Baker, De novo design of modular and tunable protein biosensors, *Nature*, 2021, **591**, 482-487.10.1038/s41586-021-03258-z
  13. D. D. Sahtoe, F. Praetorius, A. Courbet, Y. Hsia, B. I. M. Wicky, N. I. Edman, L. M. Miller, B. J. R. Timmermans, J. Decarreau, H. M. Morris, A. Kang, A. K. Bera and D. Baker, Reconfigurable asymmetric protein assemblies through implicit negative design, *Science (New York, N.Y.)*, 2022, **375**, eabj7662.10.1126/science.abj7662
  14. A. C. Hunt, J. B. Case, Y. J. Park, L. Cao, K. Wu, A. C. Walls, Z. Liu, J. E. Bowen, H. W. Yeh, S. Saini, L. Helms, Y. T. Zhao, T. Y. Hsiang, T. N. Starr, I. Goreshnik, L. Kozodoy, L. Carter, R. Ravichandran, L. B. Green, W. L. Matochko, C. A. Thomson, B. Vögeli, A. Krüger, L. A. VanBlargan, R. E. Chen, B. Ying, A. L. Bailey, N. M. Kafai, S. E. Boyken, A. Ljubetič, N. Edman, G. Ueda, C. M. Chow, M. Johnson, A. Addetia, M. J. Navarro, N. Panpradist, M. Gale, Jr., B. S. Freedman, J. D. Bloom, H. Ruohola-Baker, S. P. J. Whelan, L. Stewart, M. S. Diamond, D. Veessler, M. C. Jewett and D. Baker, Multivalent designed proteins neutralize SARS-CoV-2 variants of concern and confer protection against infection in mice, *Science translational medicine*, 2022, **14**, eabn1252.10.1126/scitranslmed.abn1252
  15. S. Yao, A. Moyer, Y. Zheng, Y. Shen, X. Meng, C. Yuan, Y. Zhao, H. Yao, D. Baker and C. Wu, De novo design and directed folding of disulfide-bridged peptide heterodimers, *Nature Communications*, 2022, **13**, 1539.10.1038/s41467-022-29210-x
  16. D.-A. Silva, S. Yu, U. Y. Ulge, J. B. Spangler, K. M. Jude, C. Labão-Almeida, L. R. Ali, A. Quijano-Rubio, M. Ruterbusch, I. Leung, T. Biary, S. J. Crowley, E. Marcos, C. D. Walkey, B. D. Weitzner, F. Pardo-Avila, J. Castellanos, L. Carter, L. Stewart, S. R. Riddell, M. Pepper, G. J. L. Bernardes, M. Dougan, K. C. Garcia and D. Baker, De novo design of potent and selective mimics of IL-2 and IL-15, *Nature*, 2019, **565**, 186-191.10.1038/s41586-018-0830-7
  17. Z. Chen, S. E. Boyken, M. Jia, F. Busch, D. Flores-Solis, M. J. Bick, P. Lu, Z. L. VanAernum, A. Sahasrabudhe, R. A. Langan, S. Bermeo, T. J. Brunette, V. K. Mulligan, L. P. Carter, F. DiMaio, N. G. Sgourakis, V. H. Wysocki and D. Baker, Programmable design of orthogonal protein heterodimers, *Nature*, 2019, **565**, 106-111.10.1038/s41586-018-0802-y
  18. K. Mohan, G. Ueda, A. R. Kim, K. M. Jude, J. A. Fallas, Y. Guo, M. Hafer, Y. Miao, R. A. Saxton, J. Piehler, V. G. Sankaran, D. Baker and K. C. Garcia, Topological control of cytokine receptor signaling induces differential effects in hematopoiesis, *Science (New York, N.Y.)*, 2019, **364**, eaav7532.10.1126/science.aav7532
  19. G. Ueda, A. Antanasijevic, J. A. Fallas, W. Sheffler, J. Copps, D. Ellis, G. B. Hutchinson, A. Moyer, A. Yasmeen, Y. Tsybovsky, Y. J. Park, M. J. Bick, B. Sankaran, R. A. Gillespie, P. J. Brouwer, P. H. Zwart, D. Veessler, M. Kanekiyo, B. S. Graham, R. W. Sanders, J. P. Moore, P. J. Klasse, A. B. Ward, N. P. King and D. Baker, Tailored design of protein nanoparticle scaffolds for multivalent presentation of viral glycoprotein antigens, *eLife*, 2020, **9**, e57659.10.7554/eLife.57659
